# Supplementary material for: Sodium alginate coating simultaneously increases the biosafety and immunotherapeutic activity of the cationic mRNA nanovaccine
Source: PubMed Central journal article supplement — Acta Pharm Sin B. 2022 Aug 27;13(3):942–54. doi: 10.1016/j.apsb.2022.08.015 (PMC10031150; doi:10.1016/j.apsb.2022.08.015), 2022-08-27
Supplement: mmc1.pdf [file mmc1.pdf]

## Supporting information for

### ORIGINAL ARTICLE

# Sodium alginate coating simultaneously increases the biosafety and immunotherapeutic activity of the cationic mRNA nanovaccine

Xing Duan<sup>a,†</sup>, Yi Zhang<sup>b,†</sup>, Mengran Guo<sup>b</sup>, Na Fan<sup>a</sup>, Kepan Chen<sup>a</sup>, Shugang Qin<sup>a</sup>, Wen Xiao<sup>a</sup>, Qian Zheng<sup>a</sup>, Hai Huang<sup>a</sup>, Xiawei Wei<sup>a</sup>, Yuquan Wei<sup>a</sup>, Xiangrong Song<sup>a,\*</sup>

<sup>a</sup>Department of Critical Care Medicine, Department of Clinical Pharmacy, Frontiers Science Center for Disease-related Molecular Network, State Key Laboratory of Biotherapy and Cancer Center, West China Hospital, Sichuan University, Chengdu 610041, China

<sup>b</sup>West China hospital, Sichuan University, Chengdu 610041, China

Received 6 June 2022; received in revised form 10 August 2022; accepted 16 August 2022

<sup>†</sup>These authors made equal contributions to this work.

\*Corresponding authors. Tel./fax: 028 8550 3817.

E-mail address: songxr@scu.edu.cn (Xiangrong Song).

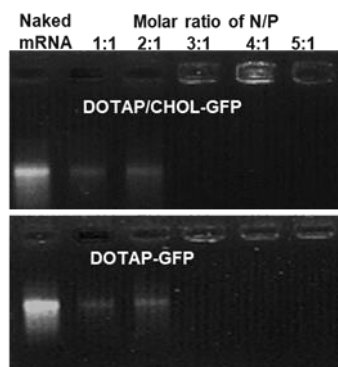

**Figure S1.** The loading capacity of DOTAP-LPs and DOTAP/ Chol-LPS on mRNA was investigated by gel electrophoresis.

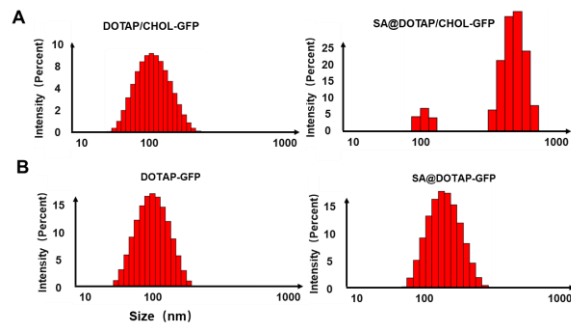

**Figure S2.** Particle size change of mRNA nano-vaccine coated with sodium alginate. (A) When the mass ratio of mRNA/SA was 1:0.5, the particle size of SA@DOTAP/CHOL-GFP. (B) When the mass ratio of mRNA/SA was 1:0.5, the particle size of SA@DOTAP -GFP.

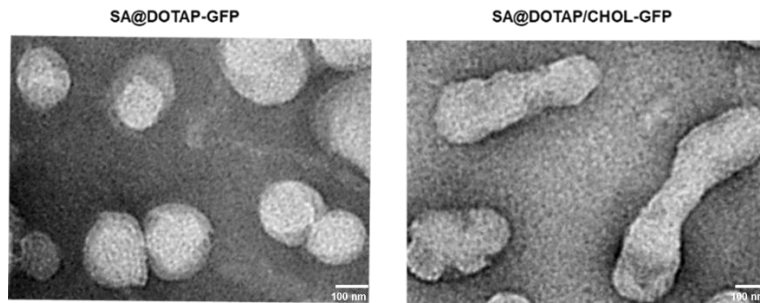

**Figure S3.** TEM investigating the structure of mRNA nano-vaccine coated with sodium alginate When the mass ratio of mRNA/SA was 1:0.5, scale bar = 100 nm.

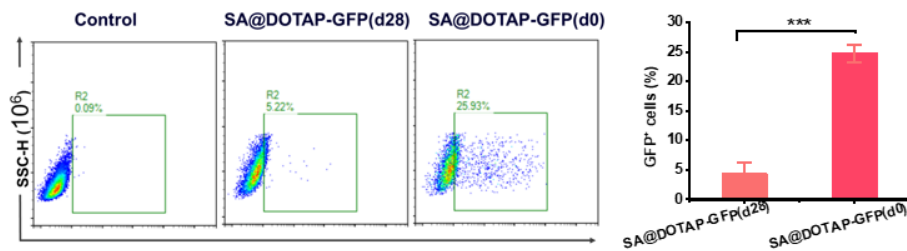

**Figure S4.** FACS analysis to investigate the mRNA transfection stability of SA@DOTAP-GFP (Day 28) and SA@DOTAP-GFP (Day 0). SA@DOTAP-GFP (Day 28): SA@DOTAP-GFP was prepared by using GFP-mRNA that stored at 4 °C for 28 days. SA@DOTAP-GFP (Day 0): SA@DOTAP-GFP that prepared by using fresh GFP-mRNA and stored at 4 °C for 28 days. Data are presented as mean  $\pm$  SD (n = 3). \*\*\*P < 0.01.

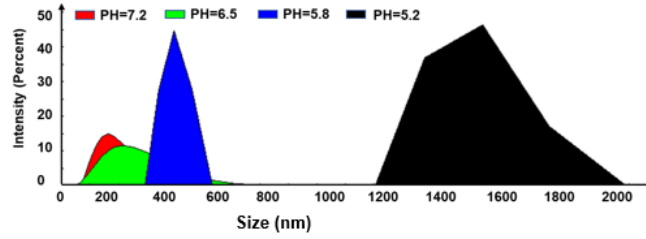

**Figure S5.** The detachment activity of SA on SA@DOTAP-mRNA.

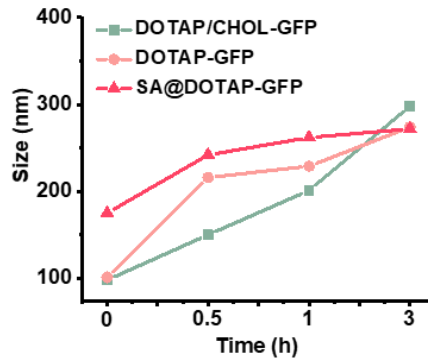

**Figure S6.** Particle size changes of DOTAP-GFP, DOTAP/CHOL-GFP, and SA@DOTAP-GFP after incubation in aqueous solution containing 50% FBS for the same time.

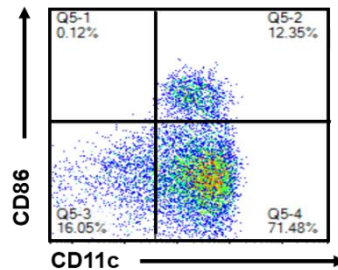

**Figure S7.** FACS analysis the purity of BMDC cells after 7 days of culture.

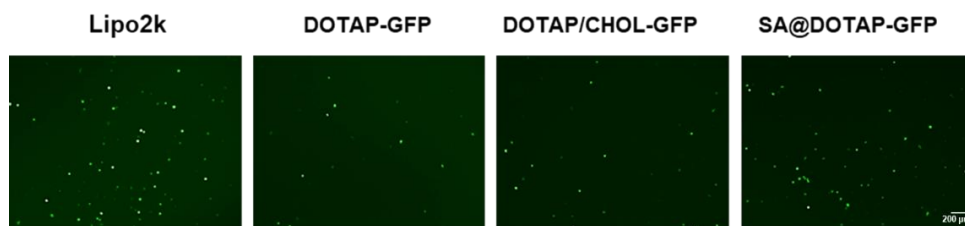

**Figure S8.** Images of GFP expression in BMDC cells, scale bar = 200  $\mu\text{m}$ .

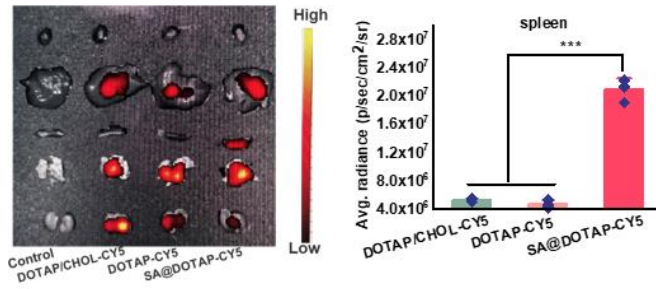

**Figure S9.** The *in vivo* distribution of CY5-mRNA in mice after intravenous injection with DOTAP/CHOL-CY5, DOTAP-CY5 and SA@DOTAP-CY5 (mean  $\pm$  SD,  $n = 3$ ), \*\*\* $P < 0.01$ .

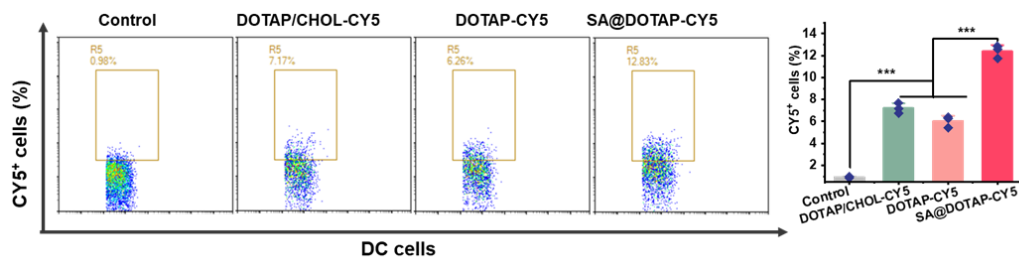

**Figure S10.** Uptake of DOTAP/CHOL-CY5, DOTAP-CY5 and SA@DOTAP-CY5 by DC cells in the spleen (mean  $\pm$  SD,  $n = 3$ ), \*\*\* $P < 0.01$ .

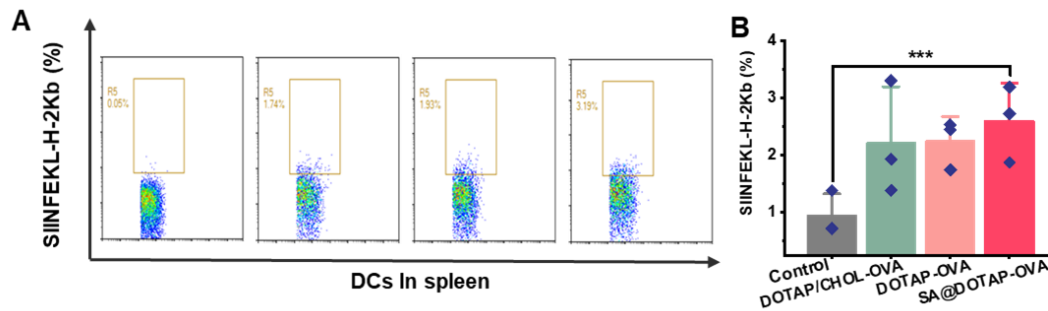

**Figure S11.** Antigen presentation of different liposome/mRNA complex on DC cells in the spleen measured by flow cytometry. (mean  $\pm$  SD,  $n = 3$ ), \*\*\* $P < 0.01$ .

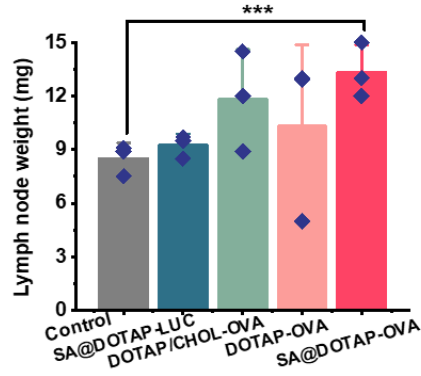

**Figure S12.** Lymph nodes weight of mice treated with liposome /mRNA complexes groups. (mean  $\pm$  SD,  $n = 3$ ), \*\*\* $P < 0.01$ .

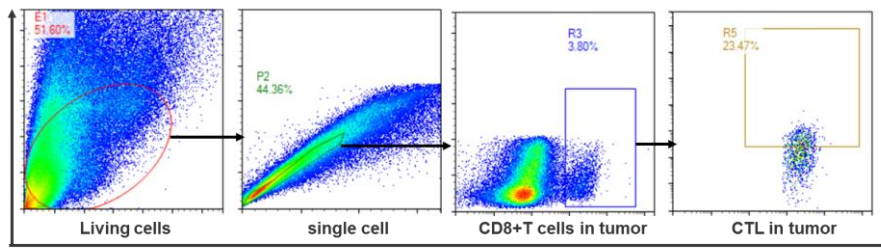

**Figure S13.** Gating strategy to selected the CTL in tumor. (mean  $\pm$  SD,  $n = 3$ ).

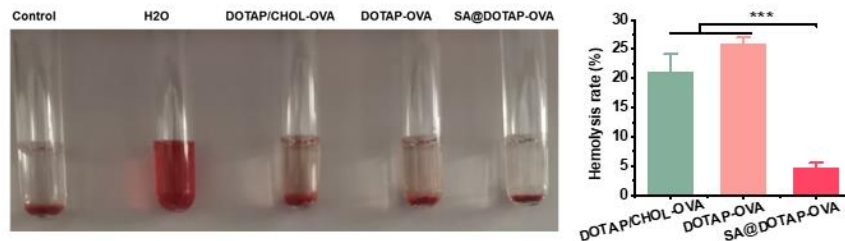

**Figure S14.** Hemolysis was performed to evaluate the safety of DOTAP/ Chol-OVA, DOTAP-OVA, and SA@DOTAP-OVA. (mean  $\pm$  SD,  $n = 3$ ), \*\*\* $P < 0.01$ .

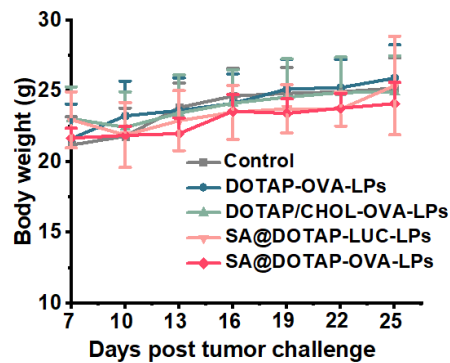

**Figure S15.** The body weight changes of mice at different times during the treatment. (mean  $\pm$  SD,  $n = 5$ ).
